# Supplementary material for: Barriers and facilitators to neurodevelopmental follow-up among at-risk newborns across Washington State
Source: Research Square preprint supplement (doi:10.21203/rs.3.rs-9475637/v1), 2026-05-20
Supplement: Supplementary file 1 [file 1410718c0991066d84e257dd.pdf]

# Neonatal Intensive Care Unit Provider Survey

This survey will address the following questions:

- Survey respondent demographics
- Patient population, referral, and scheduling processes for developmental follow-up
- Description of the developmental tests performed in your NICU

We anticipate the survey will take less than 10 minutes to complete. Thank you for your time and consideration of these questions.

---

For the purposes of this survey, a 'Neurodevelopmental Follow-up Clinic' is defined as a formal clinic providing developmental surveillance, including standardized screening assessments for neurodevelopmental disability post-NICU discharge such as Bayley Scales of Infant Development (BSID), hearing screens, or other validated tools to assess for developmental delay.

Early Support for Infants and Toddlers (ESIT) will be defined as Early Intervention or 'Birth to 3' services that are provided free of charge for families throughout Washington State. ESIT provides infant evaluations and therapies such as occupational therapy (OT), physical therapy (PT), and Speech and Language Pathology (SLP) in a variety of settings, including telehealth, in-home, or within local communities. Some ESIT providers may perform developmental screenings such as Bayley Scales of Infant Development (BSID) and hearing screenings or other developmental assessments, thus may also qualify as providing neurodevelopmental follow-up.

## Survey Respondent Demographics (for documentation purposes)

Name (Last, First)

---

Organization/Hospital

---

Title (role in NICU)

---

Email Address (optional)

---

What is the level of your NICU? (Committee on the Fetus and Newborn definition)

- Level II
- Level III
- Level IV

**General Questions About Neurodevelopmental Follow-Up**

Does your institution refer NICU patients to a Neurodevelopmental Follow-up Clinic after NICU discharge?

- Yes  
 No

What are the name(s) of the Neurodevelopmental Follow-up Clinic(s) associated with your NICU? Please list all clinics where patients are referred.

Are any of these clinics considered an Early Support for Infants and Toddlers (ESIT or Early Intervention/Birth to Three) program?

- Yes  
 No

Please name which clinic(s) is considered part of ESIT.

Does the Neurodevelopmental Follow-Up Clinic provide your NICU with the results of the neurodevelopmental assessments to allow you to track the neurodevelopmental outcomes of your referred babies?

- Yes  
 No

Please share how the Neurodevelopmental Follow-up Clinics provide your NICU with the results of neurodevelopmental assessments.

- Epic Care Everywhere  
 Other Electronic Medical Record (EMR)  
 Clinic to Clinic Messaging  
 Email  
 Phone  
 Other \_\_\_\_\_  
 We do not routinely receive the results of developmental assessments from neurodevelopmental follow up clinics

Are infants approaching discharge from the NICU referred for Early Support for Infants and Toddlers (ESIT or Early Intervention/Birth to Three) Services?

- Yes  
 No

Please provide the names of the ESIT programs or agencies to whom you refer infants from your NICU.

Do ESIT programs or agencies to whom you refer infants from your NICU provide your NICU with the results of neurodevelopmental assessments?

- Yes  
 No

Please describe how the ESIT programs or agencies share results of neurodevelopmental assessments with your NICU

- Epic Care Everywhere  
 Other Electronic Medical Record (EMR)  
 Clinic to Clinic Messaging  
 Email  
 Phone  
 Other \_\_\_\_\_  
 We do not routinely receive the results of developmental assessments from ESIT (Early Intervention) programs

### Patient Population, Referral, and Appointment Scheduling Process

During NICU hospitalization, what screening criteria are used for referral for a Neurodevelopmental Follow-up Clinic? Select all that apply.

Please specify criteria for birth weight (in grams), gestational age (in weeks), or other criteria if applicable.

- Birth weight (grams) \_\_\_\_\_  
 Gestational age (weeks) \_\_\_\_\_  
 History of neonatal opiate withdrawal syndrome (NOWS)  
 History of birth asphyxia or hypoxic-ischemic encephalopathy (HIE)  
 History of seizures in newborn period  
 History of non-cardiac surgery  
 History of cardiac surgery  
 History of extracorporeal life support (ECLS) or extracorporeal membrane oxygenation (ECMO) use  
 Other criteria \_\_\_\_\_  
 Infants are not referred to a Neurodevelopmental Follow-up Clinic

Who is responsible for placing the infant referral for a Neurodevelopmental Follow-Up Clinic appointment? Select all that apply.

- NICU Medical Provider (e.g., resident physician, neonatologist, hospitalist, PA, NNP)  
 NICU Discharge Coordinator  
 NICU Social Worker  
 NICU Infant therapy team member (e.g., physical or occupational therapist)  
 NICU Speech or feeding therapist  
 We do not refer to a Neurodevelopmental Follow-up Clinic  
 Other \_\_\_\_\_  
 I am not sure

Who is responsible for scheduling the initial Neurodevelopmental Follow-Up Clinic appointment? Select all that apply.

- NICU Discharge Coordinator  
 NICU Medical Provider (e.g., resident physician, neonatologist, hospitalist, PA, NNP)  
 Neurodevelopmental follow-up clinic coordinator  
 NICU Social Worker  
 NICU Infant therapy team member (e.g., physical or occupational therapist)  
 NICU Speech or feeding therapist  
 Patient's family  
 Other \_\_\_\_\_  
 I am not sure

---

At what corrected gestational age in months is the first neurodevelopmental follow-up appointment scheduled? For example, if first appointment scheduled at 3 months corrected, please write "3". If not known, please write "00".

---

Who is responsible for referring infants and families for Early Support for Infants and Toddlers (ESIT) prior to NICU discharge?

- NICU Medical Provider (e.g, resident physician, neonatologist, hospitalist, PA, NNP)
  - NICU Discharge Coordinator
  - NICU Social Worker
  - NICU Infant therapy team member (e.g., physical or occupational therapy)
  - NICU Speech or feeding therapist
  - Other \_\_\_\_\_
  - ESIT referral is not placed prior to NICU discharge
  - I am not sure
- 

Who is responsible for scheduling the initial Early Support for Infants and Toddlers (ESIT) evaluation?

- NICU Medical Provider (e.g, resident physician, neonatologist, hospitalist, PA, NNP)
  - NICU Discharge Coordinator
  - NICU Social Worker
  - NICU Infant therapy team member (e.g., physical or occupational therapist)
  - NICU Speech or feeding therapist
  - Patient's family
  - Other \_\_\_\_\_
  - I am not sure
- 

Optional: if comfortable, feel free to attach your policy and/or document outlining the referral process.

### Developmental Assessment in the NICU

Does your institution currently provide any neurodevelopmental or feeding assessments within the NICU hospitalization at your institution?

- Yes
  - No
- 

What assessments are performed? Select all that apply.

- Hammersmith Neonatal Neurological Exam (HNNE)
- General Movements Assessment (GMA)
- Premie Neuro Exam
- Neonatal Neurobehavioral Scale (NNS)
- Clinical Swallow Studies or Feeding Evaluations
- I am not sure
- Other \_\_\_\_\_
- none

---

Who administers these assessments? Select all that apply.

- Neonatal Nurse Practitioners (NNP)
- Registered Nurses (RN)
- Physicians Assistants (PA)
- Physicians (MD, DO)
- Psychologists
- Infant therapy team (e.g., Physical or Occupational Therapy)
- Speech/Language or feeding specialists
- Researchers
- Other \_\_\_\_\_
- I am not sure

---

How is information regarding neurodevelopmental screening in the NICU shared with the family? (Select all that apply)

- Results are shared directly with the family by the therapist performing exam (e.g., occupational, physical, feeding therapist)
- Results are shared directly with the family by a provider (e.g., neonatologist, neurologist, pediatrician)
- Results are shared with the family in a multi-disciplinary care conference
- Results of the neurodevelopmental screening tests are not directly shared with the family
- Other way of sharing results \_\_\_\_\_
- I am not sure

---

If needed, are Magnetic Resonance Imaging (MRI) scans available for NICU patients at your institution?

- Yes
- No
